# Supplementary figures and images for: Simultaneous measurement and quantitation of 4-hydroxyphenylacetic acid and dopamine with fast-scan cyclic voltammetry
Source: Royal Society of Chemistry journal article supplement (doi:10.1039/c4an02007c), 2015-01-01

## Supplementary Information

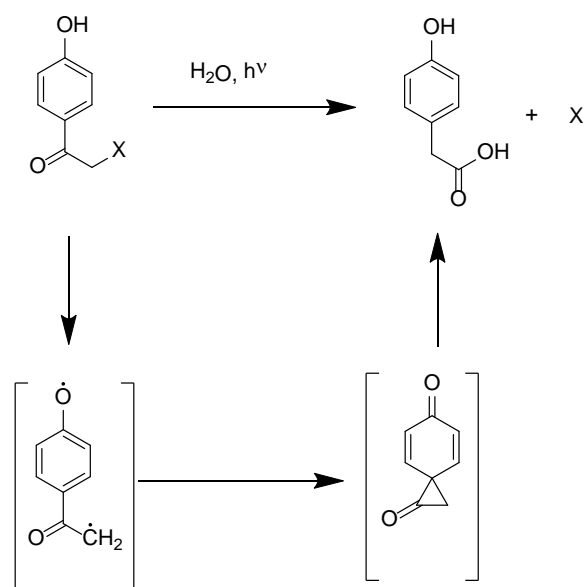

Scheme 1. The mechanism for the Favorskii reaction

Supplement: c4an02007c1.pdf [file c4an02007c1.pdf]
